# Supplementary material for: A systematic approach to estimate the distribution and total abundance of British mammals
Source: PubMed Central journal article supplement (PMC5489149; doi:10.1371/journal.pone.0176339), 2017-06-28
Supplement: pone.0176339.s002.pdf [file pone.0176339.s002.pdf]

## Supplement 2: Model results and predictions

### S2.1 Summary of modelling results and predictions

**Table A.** Summary of modelling results for each species grouped by taxonomic order. Statistics for habitat suitability predictions include: the mean Area Under Curve of the “best” model across 100 repetitions (AUC describes the capability of species distribution models to correctly predict occurrence and absence with a random model displaying an AUC of 0.5 and the “best” model as that with the highest value); the most commonly selected “best” model (Mode) across all repetitions; the spatial extent of predicted occurrence (number of grid cells where occurrence is predicted - values in brackets indicate the corresponding extent of observed occurrence); based on a resolution of 10km (all records) and 1km (occurrence records  $\leq$  1km only) respectively. Statistics for abundance include: the estimate as presented by Harris et al. 1995 [1] (numbers in subscript indicate the reliability of the estimate, where 5 denotes the least, and 1 most, reliable.); the predicted range of abundance (upper and lower bound produced when projecting density polygons onto a raster grid assuming estimate applies to entire cell and estimate applies only to the proportion of area surveyed respectively) and the minimum predicted change from the 1995 estimate (trend direction denoted by arrow shown in brackets) based on a resolution of 10km and 1km respectively; the population trend pre 1995 as published by Harris et al. 1995 [1], where (\*) indicates no trend available and ( $\uparrow$ ), ( $\downarrow$ ) and ( $\leftrightarrow$ ) indicate increasing, decreasing and stable population trends respectively; the population trend post 1995 taken as the most recent prediction from a selection of sources which use temporal fluctuations in species recording to infer changes in relative abundance (arrows in brackets show the published trend from each source as follows: Battersby et al. 2005 [2]; NGC GWCT 1995 - 2009 [3]; BBS 1995 - 2014 [4]; BCT 2014 [5]).

Symbols relating to abundance predictions are as follows: ( $\gamma$ ) denotes abundance modelled by generalised linear regression model using gamma distribution; (sph) and (gau) denote abundance modelled by mixed linear regression model using spherical and Gaussian spatial autocorrelation functions respectively; (0), (1) and (2) denote the order of regression used to relate habitat suitability score and density (i.e. 0:  $d \sim 1$ , 1:  $d \sim hs$  and 2:  $d \sim hs + (hs^2)$ ). Unless otherwise stated regression was performed using a simple linear model according to a Gaussian distribution with no spatial autocorrelation.

| Common Name                | Habitat Suitability |             |               |           |            |                 | Abundance                  |                                                           |                         |                                                           |                         |                |                                                             |
|----------------------------|---------------------|-------------|---------------|-----------|------------|-----------------|----------------------------|-----------------------------------------------------------|-------------------------|-----------------------------------------------------------|-------------------------|----------------|-------------------------------------------------------------|
|                            | AUC (10km)          | Mode (10km) | Extent (10km) | AUC (1km) | Mode (1km) | Extent (1km)    | 1995 estimate <sup>1</sup> | Predicted range (10km)                                    | Min. change (10km)      | Predicted range (1km)                                     | Min. change (1km)       | Trend pre 1995 | Trend post 1995                                             |
| <b>Marsupialia</b>         |                     |             |               |           |            |                 |                            |                                                           |                         |                                                           |                         |                |                                                             |
| Red-necked wallaby         | 0.78                | MaxEnt      | 126 (25)      | 0.85      | MaxEnt     | 8611 (17)       | 29 <sup>1</sup>            | 3,590 <sup>0</sup> - 728,030 <sup>0</sup>                 | 123 ( $\uparrow$ )      | 61,019 <sup>v,0</sup> - 494,959 <sup>gau,0</sup>          | 2,103 ( $\uparrow$ )    | *              | * (****)                                                    |
| <b>Insectivora</b>         |                     |             |               |           |            |                 |                            |                                                           |                         |                                                           |                         |                |                                                             |
| Hedgehog                   | 0.86                | MaxEnt      | 2,137 (2,347) | 0.69      | RF         | 65,647 (26,572) | 1,555,000 <sup>4</sup>     | 731,546 <sup>sph,2</sup> - 11,979,363 <sup>sph,2</sup>    | 0 ( $\leftrightarrow$ ) | 657,712 <sup>sph,2</sup> - 3,222,149 <sup>sph,1</sup>     | 0 ( $\leftrightarrow$ ) | $\downarrow$   | $\leftrightarrow$ ( $\leftrightarrow$ $\leftrightarrow$ **) |
| Mole                       | 0.84                | MaxEnt      | 2,018 (2,384) | 0.63      | RF         | 94,551 (22,602) | 31,000,000 <sup>3</sup>    | 126,065 <sup>v,0</sup> - 109,231,019 <sup>v,0</sup>       | 0 ( $\leftrightarrow$ ) | 2,976,177 <sup>0</sup> - 61,561,156 <sup>v,1</sup>        | 0 ( $\leftrightarrow$ ) | *              | $\leftrightarrow$ ( $\leftrightarrow$ **)                   |
| Common shrew               | 0.70                | MaxEnt      | 1,808 (1,877) | 0.64      | MaxEnt     | 80,620 (4,942)  | 41,700,000 <sup>3</sup>    | 1,838,490 <sup>sph,2</sup> - 223,651,088 <sup>sph,2</sup> | 0 ( $\leftrightarrow$ ) | 11,469,553 <sup>sph,0</sup> - 56,014,632 <sup>sph,0</sup> | 0 ( $\leftrightarrow$ ) | *              | * (****)                                                    |
| Pygmy shrew                | 0.66                | MaxEnt      | 1,533 (1,309) | 0.65      | MaxEnt     | 63,138 (2,122)  | 8,600,000 <sup>4</sup>     | 11,566 <sup>0</sup> - 36,213,441 <sup>0</sup>             | 0 ( $\leftrightarrow$ ) | 113,760 <sup>0</sup> - 23,992,074 <sup>sph,0</sup>        | 0 ( $\leftrightarrow$ ) | *              | * (****)                                                    |
| Water shrew                | 0.65                | MaxEnt      | 1,506 (1,080) | 0.67      | MaxEnt     | 59,072 (1,716)  | 1,900,000 <sup>4</sup>     | 22,166 <sup>1</sup> - 406,189 <sup>1</sup>                | -0.8 ( $\downarrow$ )   | 82,134 <sup>0</sup> - 175,655 <sup>sph,0</sup>            | -0.91 ( $\downarrow$ )  | $\downarrow$   | * (****)                                                    |
| Lesser white-toothed shrew | -                   | -           | - (4)         | -         | -          | - (3)           | 14,000 <sup>4</sup>        | -                                                         | -                       | -                                                         | -                       | *              | * (****)                                                    |

| Chiroptera              |      |        |               |      |        |                  |                         |                                                           |           |                                                              |           |   |           |
|-------------------------|------|--------|---------------|------|--------|------------------|-------------------------|-----------------------------------------------------------|-----------|--------------------------------------------------------------|-----------|---|-----------|
| Greater horseshoe bat   | 0.76 | MaxEnt | 355 (282)     | 0.66 | MaxEnt | 11,039 (981)     | 4,000 <sup>2</sup>      | -                                                         | -         | -                                                            | -         | ↓ | ↑ (↑***↑) |
| Lesser horseshoe bat    | 0.73 | MaxEnt | 517 (438)     | 0.65 | RF     | 18,747 (2,232)   | 14,000 <sup>2</sup>     | -                                                         | -         | -                                                            | -         | ↓ | ↑ (↑***↑) |
| Whiskered bat           | 0.67 | MaxEnt | 1,046 (608)   | 0.64 | RF     | 44,029 (979)     | 40,000 <sup>4</sup>     | 30,892 <sup>v,0</sup> - 145,757 <sup>0</sup>              | 0 (↔)     | 0 <sup>sph,1</sup> - 65,734 <sup>sph,1</sup>                 | 0 (↔)     | ↓ | ↔ (↔**↔)  |
| Brandt's bat            | 0.63 | SVM    | 820 (228)     | 0.63 | MaxEnt | 50,780 (269)     | 30,000 <sup>5</sup>     | 17,894 <sup>v,0</sup> - 129,646 <sup>v,0</sup>            | 0 (↔)     | 5 <sup>sph,1</sup> - 86,077 <sup>sph,0</sup>                 | 0 (↔)     | ↓ | ↔ (↔**↔)  |
| Natterer's bat          | 0.69 | RF     | 1,392 (1,103) | 0.65 | RF     | 51,836 (2,334)   | 100,000 <sup>4</sup>    | 76,593 <sup>0</sup> - 1,709,679 <sup>sph,0</sup>          | 0 (↔)     | 77,209 <sup>sph,2</sup> - 670,172 <sup>sph,1</sup>           | 0 (↔)     | ↓ | ↑ (↑***↑) |
| Bechstein's bat         | 0.72 | GLM    | 214 (100)     | 0.69 | MaxEnt | 6768 (204)       | 1,500 <sup>2</sup>      | 17,424 <sup>0</sup> - 6,590,798 <sup>0</sup>              | 10.6 (↑)  | 145,598 <sup>sph,0</sup> - 2,202,891 <sup>gau,0</sup>        | 96.1 (↑)  | ↓ | * (****)  |
| Greater mouse-eared bat | -    | -      | - (8)         | 0.86 | MaxEnt | 12,403 (12)      | 0 <sup>1</sup>          | -                                                         | -         | -                                                            | -         | ↓ | * (****)  |
| Daubenton's bat         | 0.69 | MaxEnt | 1,493 (1,375) | 0.65 | RF     | 73,026 (3,268)   | 150,000 <sup>4</sup>    | 39,292 <sup>v,0</sup> - 245,200 <sup>sph,0</sup>          | 0 (↔)     | 478 <sup>sph,2</sup> - 124,228 <sup>sph,0</sup>              | -0.17 (↓) | ↓ | ↔ (↑**↔)  |
| Serotine                | 0.70 | RF     | 715 (561)     | 0.64 | MaxEnt | 28,756 (1,656)   | 15,000 <sup>4</sup>     | 5,419 <sup>v,0</sup> - 20,733 <sup>v,0</sup>              | 0 (↔)     | 0 <sup>sph,0</sup> - 7,736 <sup>sph,0</sup>                  | -0.48 (↓) | ↓ | ↔ (***↔)  |
| Noctule                 | 0.69 | RF     | 1,374 (1,126) | 0.64 | RF     | 50,932 (3,581)   | 50,000 <sup>3</sup>     | 26,182 <sup>v,0</sup> - 190,611 <sup>1</sup>              | 0 (↔)     | 0 <sup>sph,1</sup> - 75,953 <sup>gau,0</sup>                 | 0 (↔)     | ↓ | ↔ (↔**↔)  |
| Leisler's bat           | 0.63 | MaxEnt | 714 (193)     | 0.64 | MaxEnt | 37,705 (232)     | 10,000 <sup>4</sup>     | 30,319 <sup>0</sup> - 356,068 <sup>0</sup>                | 2 (↑)     | 3,566 <sup>sph,1</sup> - 208,016 <sup>sph,0</sup>            | 0 (↔)     | ↓ | * (****)  |
| Pipistrelle             | 0.76 | MaxEnt | 1,886 (1,919) | 0.67 | RF     | 73,996 (9,645)   | 2,000,000 <sup>3</sup>  | 454,098 <sup>sph,2</sup> - 1,849,199 <sup>sph,2</sup>     | -0.1 (↓)  | 416,237 <sup>sph,1</sup> - 782,758 <sup>sph,0</sup>          | -0.61 (↓) | ↓ | ↑ (↑***↑) |
| Nathusius' pipistrelle  | 0.64 | RF     | 808 (214)     | 0.68 | GLM    | 25,248 (257)     | -                       | -                                                         | -         | -                                                            | -         | ↓ | * (****)  |
| Barbastelle             | 0.66 | SVM    | 555 (281)     | 0.67 | MaxEnt | 13,981 (546)     | 5,000 <sup>5</sup>      | -                                                         | -         | -                                                            | -         | ↓ | * (****)  |
| Brown long-eared bat    | 0.75 | MaxEnt | 1,784 (1,650) | 0.65 | RF     | 66,839 (7,691)   | 200,000 <sup>4</sup>    | 133,497 <sup>sph,2</sup> - 374,147 <sup>sph,0</sup>       | 0 (↔)     | 20,692 <sup>sph,1</sup> - 149,731 <sup>sph,0</sup>           | -0.25 (↓) | ↓ | ↔ (↔**↔)  |
| Grey long-eared bat     | 0.79 | MaxEnt | 119 (38)      | 0.72 | SVM    | 2,587 (89)       | 1,000 <sup>3</sup>      | -                                                         | -         | -                                                            | -         | ↓ | * (****)  |
| Lagomorpha              |      |        |               |      |        |                  |                         |                                                           |           |                                                              |           |   |           |
| Rabbit                  | 0.84 | RF     | 2,144 (2,539) | 0.63 | MaxEnt | 113,968 (21,840) | 37,500,000 <sup>3</sup> | 2,069,527 <sup>0</sup> - 255,508,540 <sup>0</sup>         | 0 (↔)     | 97,105,355 <sup>1</sup> - 190,325,669 <sup>sph,0</sup>       | 1.59 (↑)  | ↑ | ↓ (↓↔↓*)  |
| Brown hare              | 0.82 | MaxEnt | 2,059 (2,151) | 0.62 | RF     | 89,415 (16,497)  | 817,500 <sup>2</sup>    | 118,829 <sup>sph,2</sup> - 3,393,442 <sup>sph,2</sup>     | 0 (↔)     | 205,708 <sup>sph,1</sup> - 1,006,524 <sup>sph,0</sup>        | 0 (↔)     | ↓ | ↔ (↔↑↔*)  |
| Mountain hare           | 0.77 | GLM    | 665 (572)     | 0.68 | GLM    | 17,614 (1,509)   | 350,000 <sup>3</sup>    | 2,633 <sup>0</sup> - 1,186,763 <sup>0</sup>               | 0 (↔)     | 25,078 <sup>1</sup> - 493,613 <sup>sph,0</sup>               | 0 (↔)     | ↑ | ↔ (↓↔↔*)  |
| Rodentia                |      |        |               |      |        |                  |                         |                                                           |           |                                                              |           |   |           |
| Red squirrel            | 0.73 | MaxEnt | 1,295 (1,234) | 0.66 | -      | 45,944 (13,211)  | 160,000 <sup>3</sup>    | 305,073 <sup>1</sup> - 11,237,141 <sup>sph,2</sup>        | 0.91 (↑)  | 338,670 <sup>sph,2</sup> - 3,783,303 <sup>sph,0</sup>        | 1.12 (↑)  | ↓ | * (****)  |
| Grey squirrel           | 0.81 | MaxEnt | 1,870 (1,954) | 0.64 | MaxEnt | 81,703 (20,797)  | 2,520,000 <sup>3</sup>  | 1,545,851 <sup>0</sup> - 14,511,831 <sup>sph,2</sup>      | 0 (↔)     | 826,807 <sup>sph,1</sup> - 6,216,107 <sup>sph,0</sup>        | 0 (↔)     | ↑ | ↑ (↑↔↔*)  |
| Bank vole               | 0.72 | MaxEnt | 1,582 (1,459) | 0.64 | MaxEnt | 61,694 (3325)    | 23,000,000 <sup>3</sup> | 189,622 <sup>0</sup> - 204,426,956 <sup>sph,2</sup>       | 0 (↔)     | 963,410 <sup>sph,0</sup> - 70,220,233 <sup>sph,0</sup>       | 0 (↔)     | * | * (****)  |
| Skomer vole             | -    | -      | - (0)         | -    | -      | - (0)            | 7,000 <sup>1</sup>      | -                                                         | -         | -                                                            | -         | * | * (****)  |
| Field vole              | 0.67 | MaxEnt | 1,682 (1,851) | 0.64 | RF     | 65,876 (5,039)   | 75,000,000 <sup>4</sup> | 4,875,844 <sup>sph,2</sup> - 463,671,721 <sup>sph,2</sup> | 0 (↔)     | 17,915,165 <sup>sph,0</sup> - 142,267,687 <sup>sph,0</sup>   | 0 (↔)     | ↓ | * (****)  |
| Orkney vole             | -    | -      | - (1)         | 1.00 | MaxEnt | 337 (1)          | 1,000,000 <sup>1</sup>  | -                                                         | -         | 3,260,708 <sup>sph,1</sup> - 3,467,584 <sup>sph,0</sup>      | 2.26 (↑)  | ↓ | * (****)  |
| Water vole              | 0.72 | MaxEnt | 1,446 (1,609) | 0.63 | RF     | 52,594 (9,158)   | 1,169,000 <sup>3</sup>  | 544,441 <sup>sph,2</sup> - 7,995,892,846 <sup>sph,1</sup> | 0 (↔)     | 28,718,646 <sup>sph,0</sup> - 2,832,451,796 <sup>sph,0</sup> | 23.6 (↑)  | ↓ | ↓ (↓***)  |
| Wood mouse              | 0.72 | MaxEnt | 1,790 (1,831) | 0.65 | MaxEnt | 66,882 (5,134)   | 38,000,000 <sup>3</sup> | 809,118 <sup>sph,2</sup> - 218,026,188 <sup>sph,2</sup>   | 0 (↔)     | 2,456,494 <sup>sph,0</sup> - 61,269,545 <sup>sph,0</sup>     | 0 (↔)     | ↔ | * (****)  |
| Yellow-necked mouse     | 0.67 | MaxEnt | 567 (320)     | 0.63 | SVM    | 21,744 (524)     | 750,000 <sup>4</sup>    | 55,873 <sup>0</sup> - 592,033 <sup>0</sup>                | -0.21 (↓) | 99,308 <sup>sph,0</sup> - 653,113 <sup>sph,0</sup>           | -0.13 (↓) | ↓ | * (****)  |
| Harvest mouse           | 0.72 | RF     | 1,006 (843)   | 0.63 | MaxEnt | 31,194 (1,737)   | 1,425,000 <sup>5</sup>  | 12,941 <sup>sph,0</sup> - 279,861 <sup>sph,0</sup>        | -0.8 (↓)  | 38,755 <sup>v,1</sup> - 93,259 <sup>sph,0</sup>              | -0.93 (↓) | ↓ | * (****)  |
| House mouse             | 0.67 | MaxEnt | 771 (461)     | 0.68 | MaxEnt | 22,362 (1,074)   | 5,192,000 <sup>5</sup>  | 1,449 <sup>sph,0</sup> - 500,536 <sup>gau,1</sup>         | -0.9 (↓)  | 45,514 <sup>gau,0</sup> - 137,375 <sup>gau,1</sup>           | -0.97 (↓) | ↓ | * (****)  |
| Common rat              | 0.77 | MaxEnt | 1,766 (1,888) | 0.66 | MaxEnt | 59,755 (7,831)   | 6,790,000 <sup>4</sup>  | 1,724,587 <sup>1</sup> - 31,562,005 <sup>1</sup>          | 0 (↔)     | 5,829,264 <sup>1</sup> - 7,284,898 <sup>sph,0</sup>          | 0 (↔)     | ↓ | ↑ (↑↑**)  |
| Ship rat                | 0.76 | MaxEnt | 475 (86)      | 0.77 | MaxEnt | 15,169 (64)      | 1,300 <sup>2</sup>      | 4,540,169 <sup>0</sup> - 5,984,207 <sup>0</sup>           | 3,491 (↑) | 1,885,501 <sup>sph,1</sup> - 2,343,009 <sup>gau,1</sup>      | 1,449 (↑) | ↓ | * (****)  |
| Common dormouse         | 0.75 | MaxEnt | 723 (621)     | 0.66 | MaxEnt | 26,992 (3,425)   | 500,000 <sup>3</sup>    | 24,721 <sup>0</sup> - 15,758,420 <sup>0</sup>             | 0 (↔)     | -                                                            | -         | ↓ | ↓ (↓***)  |
| Fat dormouse            | 0.79 | MaxEnt | 124 (32)      | 0.71 | GLM    | 3,724 (149)      | 10,000 <sup>3</sup>     | 28,630 <sup>0</sup> - 2,914,000 <sup>0</sup>              | 1.86 (↑)  | 171,964 <sup>0</sup> - 875,133 <sup>0</sup>                  | 16.2 (↑)  | ↑ | * (****)  |
| Coypu                   | 0.74 | SVM    | 266 (193)     | 0.72 | GLM    | 3,932 (83)       | 0 <sup>1</sup>          | -                                                         | -         | -                                                            | -         | * | * (****)  |

| Carnivora          |      |        |               |      |         |                 |                      |                                                          |          |                                                        |           |   |           |
|--------------------|------|--------|---------------|------|---------|-----------------|----------------------|----------------------------------------------------------|----------|--------------------------------------------------------|-----------|---|-----------|
| Red fox            | 0.81 | MaxEnt | 1,841 (2,334) | 0.61 | RF      | 92,360 (16,433) | 240,000 <sup>4</sup> | 69,625 <sup>sph,2</sup> - 385,710 <sup>sph,2</sup>       | 0 (↔)    | 85,909 <sup>sph,2</sup> - 253,986 <sup>sph,0</sup>     | 0 (↔)     | ↑ | ↔ (↔↔↑↓*) |
| Pine marten        | 0.70 | MaxEnt | 703 (495)     | 0.69 | RF      | 18,465 (1,522)  | 3,650 <sup>2</sup>   | 2,019 <sup>1</sup> - 25,177 <sup>sph,0</sup>             | 0 (↔)    | 1,610 <sup>sph,1</sup> - 6,181 <sup>sph,0</sup>        | 0 (↔)     | ↓ | * (****)  |
| Stoat              | 0.74 | RF     | 1,822 (1,987) | 0.64 | MaxEnt  | 81,786 (7,856)  | 462,000 <sup>4</sup> | -                                                        | -        | -                                                      | -         | ↓ | ↑ (↔↔↑**) |
| Weasel             | 0.76 | MaxEnt | 1,796 (1,893) | 0.64 | MaxEnt  | 78,972 (6,515)  | 450,000 <sup>4</sup> | 1,056,431 <sup>sph,2</sup> - 24,999,091 <sup>sph,1</sup> | 1.35 (↑) | 229,804 <sup>sph,1</sup> - 11,228,731 <sup>sph,0</sup> | 0 (↔)     | ↓ | ↑ (↔↔↑**) |
| Polecat            | 0.73 | RF     | 954 (682)     | 0.63 | RF      | 58,016 (2,730)  | 15,000 <sup>3</sup>  | 52,011 <sup>sph,0</sup> - 53,475 <sup>sph,0</sup>        | 2.47 (↑) | 41,966 <sup>sph,1</sup> - 49,045 <sup>sph,0</sup>      | 1.8 (↑)   | ↑ | ↔ (↔↔↑**) |
| Feral ferret       | 0.65 | MaxEnt | 978 (353)     | 0.66 | GLM     | 34,400 (295)    | 2,500 <sup>5</sup>   | -                                                        | -        | -                                                      | -         | * | * (****)  |
| American mink      | 0.69 | RF     | 1,587 (1,568) | 0.67 | RF      | 59,352 (4,293)  | 110,000 <sup>3</sup> | 13,714 <sup>0</sup> - 2,724,393 <sup>0</sup>             | 0 (↔)    | 24,501 <sup>sph,1</sup> - 1,843,372 <sup>sph,0</sup>   | 0 (↔)     | ↑ | ↓ (↔↔↓**) |
| Badger             | 0.79 | MaxEnt | 1,908 (2,149) | 0.62 | RF      | 83,121 (12,510) | 250,000 <sup>1</sup> | 79,544 <sup>sph,2</sup> - 968,740 <sup>sph,2</sup>       | 0 (↔)    | 112,871 <sup>sph,2</sup> - 419,782 <sup>sph,0</sup>    | 0 (↔)     | ↑ | ↑ (↑***)  |
| Otter              | 0.77 | RF     | 1,877 (2,345) | 0.68 | RF      | 88,110 (14,403) | 7,350 <sup>3</sup>   | 155,399 <sup>1</sup> - 716,216 <sup>0</sup>              | 20.1 (↑) | 313,333 <sup>sph,2</sup> - 375,780 <sup>sph,1</sup>    | 41.6 (↑)  | ↑ | ↑ (↑***)  |
| Wildcat            | 0.74 | MaxEnt | 361 (265)     | 0.66 | MaxEnt  | 12,896 (352)    | 3,500 <sup>3</sup>   | 1,740 <sup>0</sup> - 16,255 <sup>sph,0</sup>             | 0 (↔)    | 232 <sup>sph,1</sup> - 6,155 <sup>sph,0</sup>          | 0 (↔)     | ↓ | * (****)  |
| Feral cat          | 0.68 | MaxEnt | 1,134 (794)   | 0.67 | MaxEnt  | 46,383 (1,371)  | 813,000 <sup>4</sup> | 254,430 <sup>sph,1</sup> - 22,644,848 <sup>sph,1</sup>   | 0 (↔)    | 500,375 <sup>sph,0</sup> - 3,506,530 <sup>sph,0</sup>  | 0 (↔)     | ↑ | ↔ (*↔**)  |
| Artiodactyla       |      |        |               |      |         |                 |                      |                                                          |          |                                                        |           |   |           |
| Red deer           | 0.72 | RF     | 1,146 (1,277) | 0.63 | RF      | 62,762 (3,604)  | 360,000 <sup>2</sup> | 379,297 <sup>sph,2</sup> - 780,812 <sup>sph,2</sup>      | 0.05 (↑) | 338,877 <sup>sph,2</sup> - 501,909 <sup>sph,0</sup>    | 0 (↔)     | ↑ | ↔ (↑↔↔*)  |
| Sika deer          | 0.70 | MaxEnt | 748 (436)     | 0.64 | RF      | 27,328 (544)    | 11,500 <sup>2</sup>  | 21,477 <sup>sph,2</sup> - 357,800 <sup>sph,2</sup>       | 0.87 (↑) | 12,941 <sup>sph,1</sup> - 71,514 <sup>sph,0</sup>      | 0.13 (↑)  | ↑ | ↑ (↑↑**)  |
| Fallow deer        | 0.71 | RF     | 1,142 (1,045) | 0.65 | MaxEnt  | 34,201 (2,134)  | 100,000 <sup>4</sup> | 303,314 <sup>0</sup> - 4,635,453 <sup>0</sup>            | 2.03 (↑) | 205,263 <sup>sph,1</sup> - 1,451,662 <sup>sph,2</sup>  | 1.05 (↑)  | ↑ | ↔ (↑↔↔*)  |
| Roe deer           | 0.76 | RF     | 1,754 (2,047) | 0.64 | RF      | 78,398 (10,853) | 500,000 <sup>3</sup> | 563,932 <sup>0</sup> - 4,500,284 <sup>sph,2</sup>        | 0.13 (↑) | 25,296 <sup>sph,2</sup> - 2,185,884 <sup>sph,0</sup>   | 0 (↔)     | ↑ | ↑ (↑↑↑*)  |
| Chinese muntjac    | 0.75 | MaxEnt | 964 (990)     | 0.66 | GLM     | 33,605 (4480)   | 40,000 <sup>3</sup>  | 1,962,152 <sup>1</sup> - 5,046,501 <sup>sph,1</sup>      | 48.1 (↑) | 169,848 <sup>sph,1</sup> - 1,844,193 <sup>sph,0</sup>  | 3.25 (↑)  | ↑ | ↑ (↑↑↑*)  |
| Chinese water deer | 0.71 | GLM    | 285 (144)     | 0.68 | GLM     | 5,278 (714)     | 650 <sup>2</sup>     | 17,781 <sup>0</sup> - 808,932 <sup>0</sup>               | 26.4 (↑) | 53,527 <sup>sph,0</sup> - 156,711 <sup>sph,0</sup>     | 81.3 (↑)  | ↑ | ↑ (↑***)  |
| Park cattle        | -    | -      | - (8)         | 0.90 | MaxEnt  | 20,162 (7)      | 45 <sup>1</sup>      | -                                                        | -        | 179,314 <sup>0</sup> - 735,333 <sup>sph,0</sup>        | 3,259 (↑) | * | * (****)  |
| Feral goat         | 0.66 | RF     | 430 (137)     | 0.67 | SVM     | 14,388 (191)    | 3,565 <sup>2</sup>   | 23,871 <sup>0</sup> - 163,909 <sup>sph,2</sup>           | 5.7 (↑)  | 3,269 <sup>sph,2</sup> - 65,463 <sup>sph,0</sup>       | 0 (↔)     | * | * (****)  |
| Feral sheep        | 0.72 | MaxEnt | 492 (29)      | 0.74 | BioClim | 40,473 (25)     | 2,100 <sup>1</sup>   | 447,819 <sup>0</sup> - 3,398,746 <sup>sph,0</sup>        | 212 (↑)  | 0 <sup>sph,0</sup> - 3,004,178 <sup>sph,0</sup>        | 0 (↔)     | * | * (****)  |
| Wild boar          | 0.80 | MaxEnt | 179 (23)      | 0.70 | Domain  | 10,129 (48)     | -                    | 188 <sup>sph,0</sup> - 3,011 <sup>sph,0</sup>            | -        | 491 <sup>sph,0</sup> - 1,850 <sup>sph,0</sup>          | -         | * | * (****)  |

[1] Harris, S., P. Morris, S. Wray and D. W. Yalden (1995). A review of British mammals: population estimates and conservation status of British mammals other than cetaceans, JNCC.

[2] Battersby, J. and Tracking Mammals Partnership (2005). UK mammals: species status and population trends. First report by the Tracking Mammals Partnership, JNCC/Tracking Mammals Partnership, Peterborough.

[3] Aebischer, N.J., P. D. Davey and N. G. Kingdon (2011). National Gamebag Census: Mammal Trends to 2009. Game & Wildlife Conservation Trust, Fordingbridge. <http://www.gwct.org.uk/ngcmammals>.

[4] Harris, S., D. Massimino, S. E. Newson, M. A. Eaton, D. E. Balmer, D. G. Noble, A. J. Musgrove, S. Gillings, D. Procter and J. W. Pearce-Higgins (2015). The Breeding Bird Survey 2014. BTO Research Report 673. British Trust for Ornithology, Thetford.

[5] Bat Conservation Trust (2014). Species population trends. [http://www.bats.org.uk/pages/species\\_population\\_trends.html](http://www.bats.org.uk/pages/species_population_trends.html).

## S2.2 Summary maps grouping species by order, origin and status

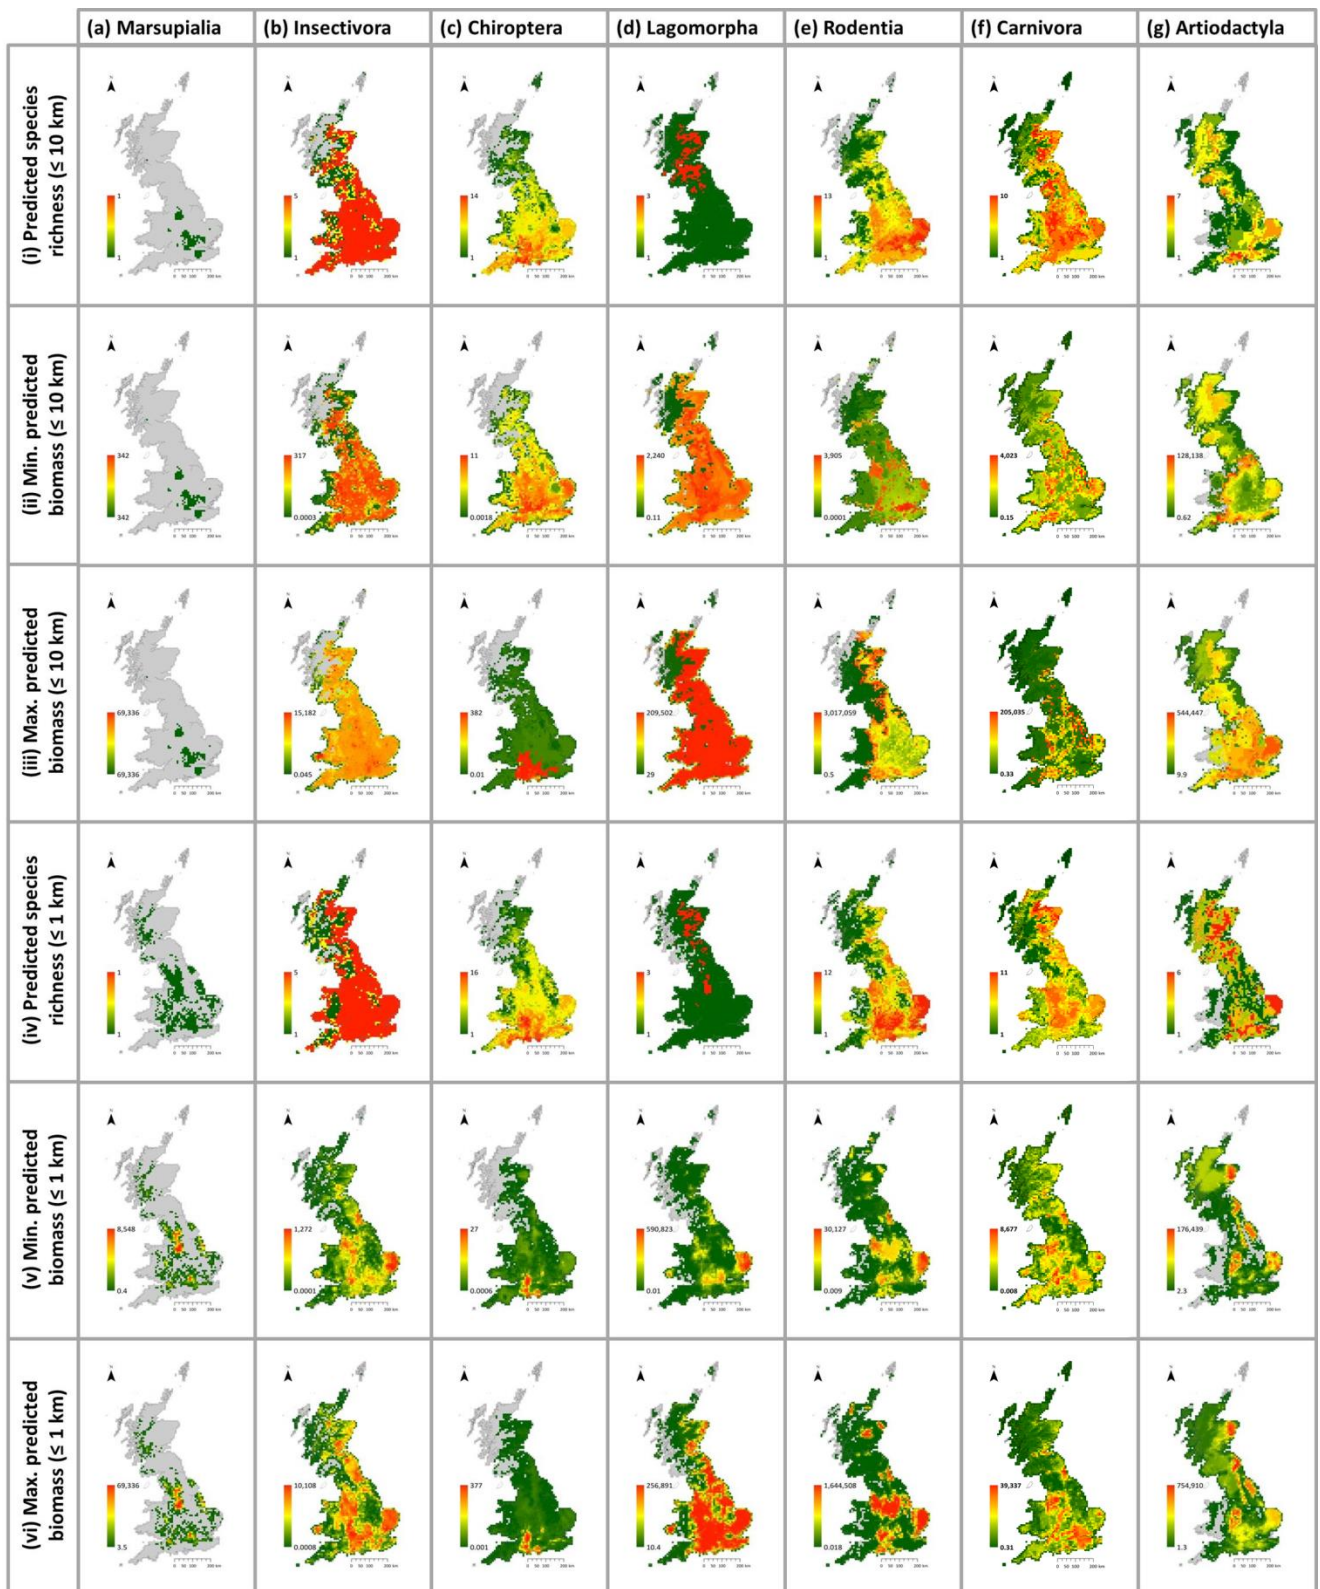

©Crown copyright and database rights 2016 Ordnance Survey 100051110.

Data courtesy of the NBN Gateway with thanks to all the data contributors. The NBN and its data contributors bear no responsibility for the further analysis or interpretation of this material, data and/or information.

**Fig A.** Summary maps showing predicted species richness and range of total biomass categorised by mammalian order for model outputs generated based on raster grids with a resolution of: (i)-(iii) 10 km (using all occurrence data); and (iv)-(vi) 1 km (using only occurrence data recorded at a resolution of 1 km or higher); respectively.

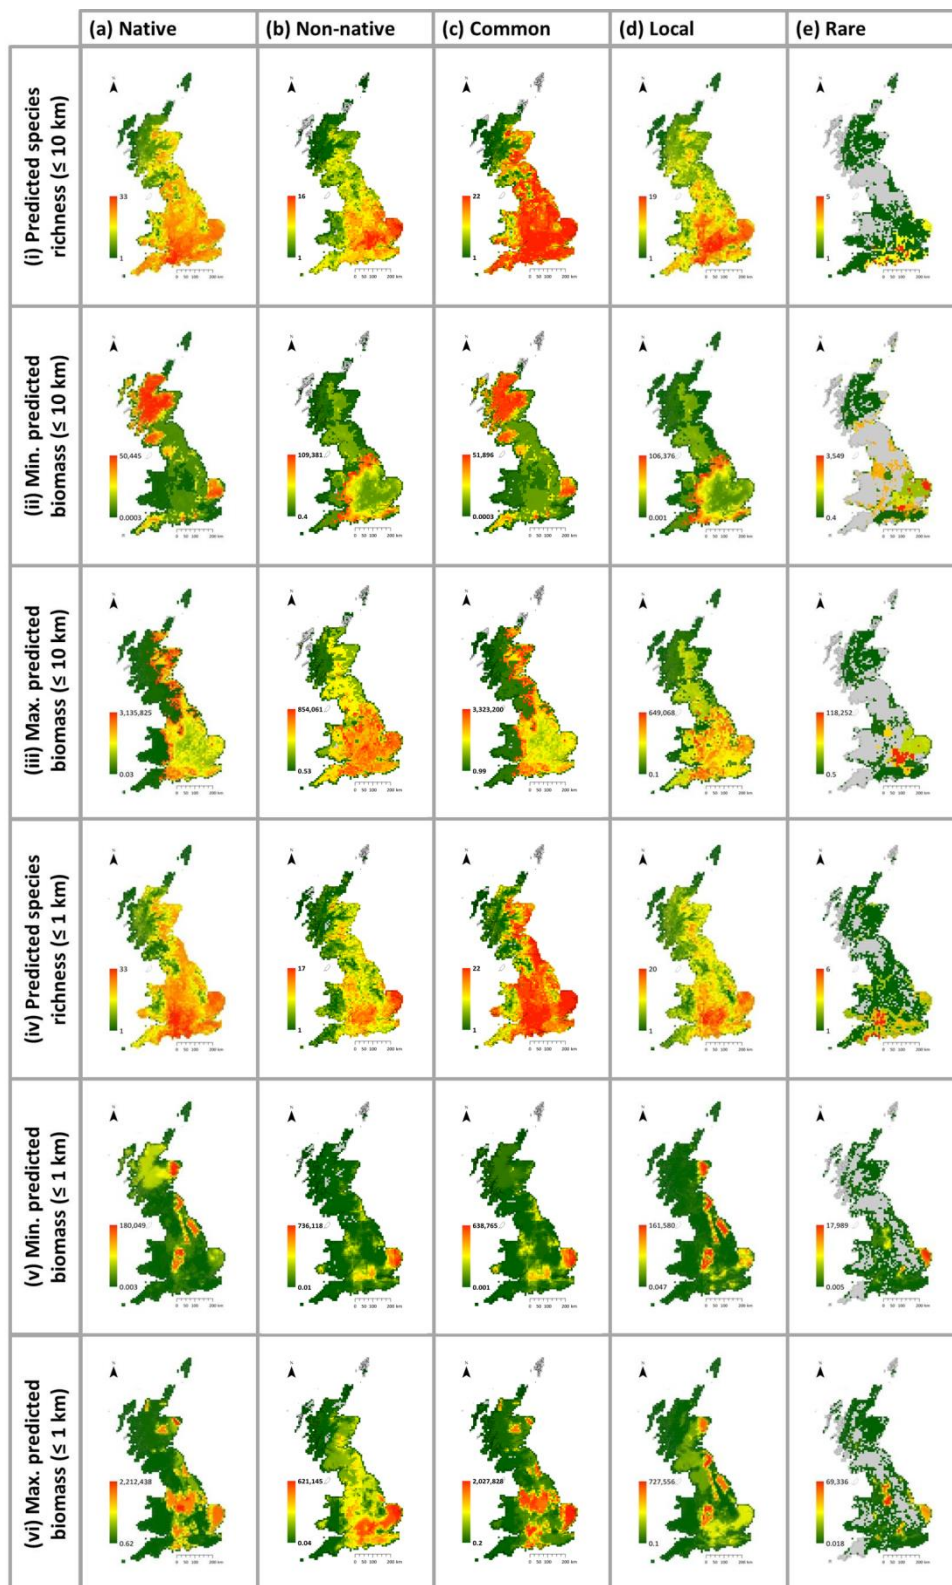

©Crown copyright and database rights 2016 Ordnance Survey 100051110.

Data courtesy of the NBN Gateway with thanks to all the data contributors. The NBN and its data contributors bear no responsibility for the further analysis or interpretation of this material, data and/or information.

**Fig B.** Summary maps showing predicted species richness and range of total biomass categorised by origin and status for model outputs generated based on raster grids with a resolution of: (i)-(iii) 10 km (using all occurrence data); and (iv)-(vi) 1 km (using only occurrence data recorded at a resolution of 1 km or higher); respectively.
